# Supplementary material for: Biomass burning emissions of trace gases and particles in marine air at Cape Grim, Tasmania
Source: Copernicus journal article supplement (doi:10.5194/acp-15-13393-2015), 2015-12-07
Supplement: Supplementary file 1 [file acp-15-13393-2015-supplement.pdf]

Supplement of Atmos. Chem. Phys., 15, 13393–13411, 2015  
<http://www.atmos-chem-phys.net/15/13393/2015/>  
doi:10.5194/acp-15-13393-2015-supplement  
© Author(s) 2015. CC Attribution 3.0 License.

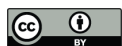

*Supplement of*

## **Biomass burning emissions of trace gases and particles in marine air at Cape Grim, Tasmania**

**S. J. Lawson et al.**

*Correspondence to:* S. J. Lawson ([sarah.lawson@csiro.au](mailto:sarah.lawson@csiro.au))

The copyright of individual parts of the supplement might differ from the CC-BY 3.0 licence.

NOAA HYSPLIT MODEL  
 Backward trajectories ending at 1900 UTC 15 Feb 06  
 GDAS Meteorological Data

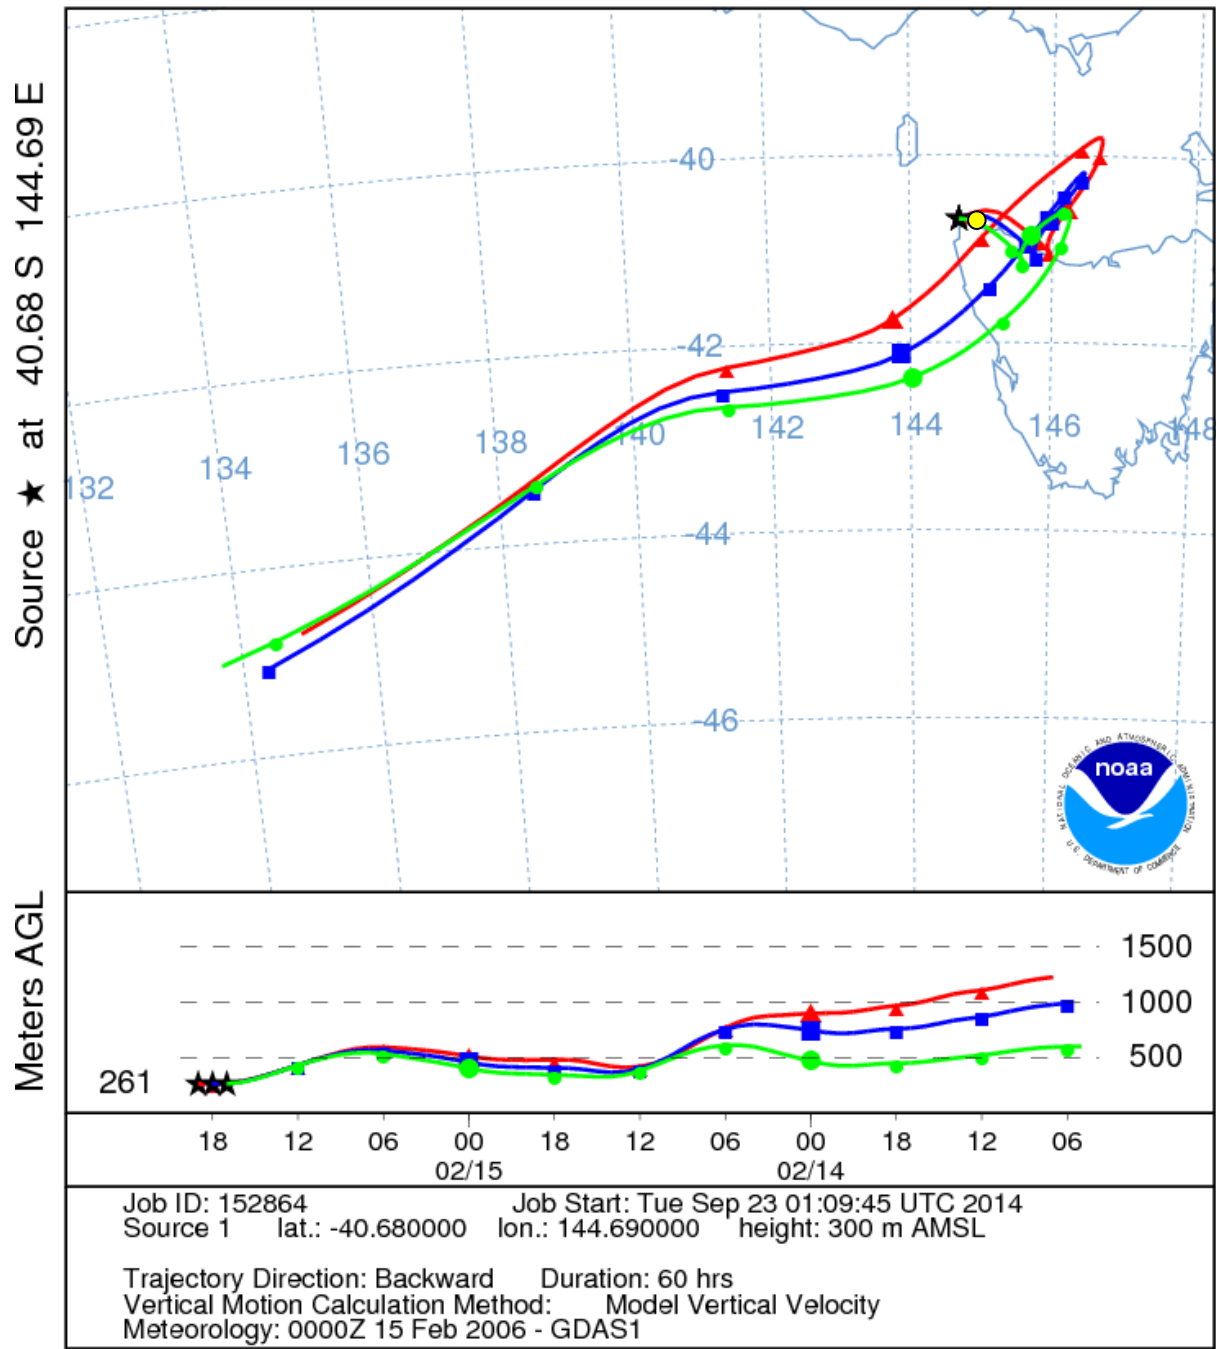

1

2 Fig 1a. Air mass back trajectory corresponding to BB1 Period A, fresh BB plume. Three back  
 3 trajectories have been run and finish at 3:00, 4:00 and 5:00 on 16<sup>th</sup> February 2006 Australian  
 4 Eastern Standard Time (AEST). Yellow circle indicates approximate fire location.

5

NOAA HYSPLIT MODEL  
 Backward trajectories ending at 0200 UTC 16 Feb 06  
 GDAS Meteorological Data

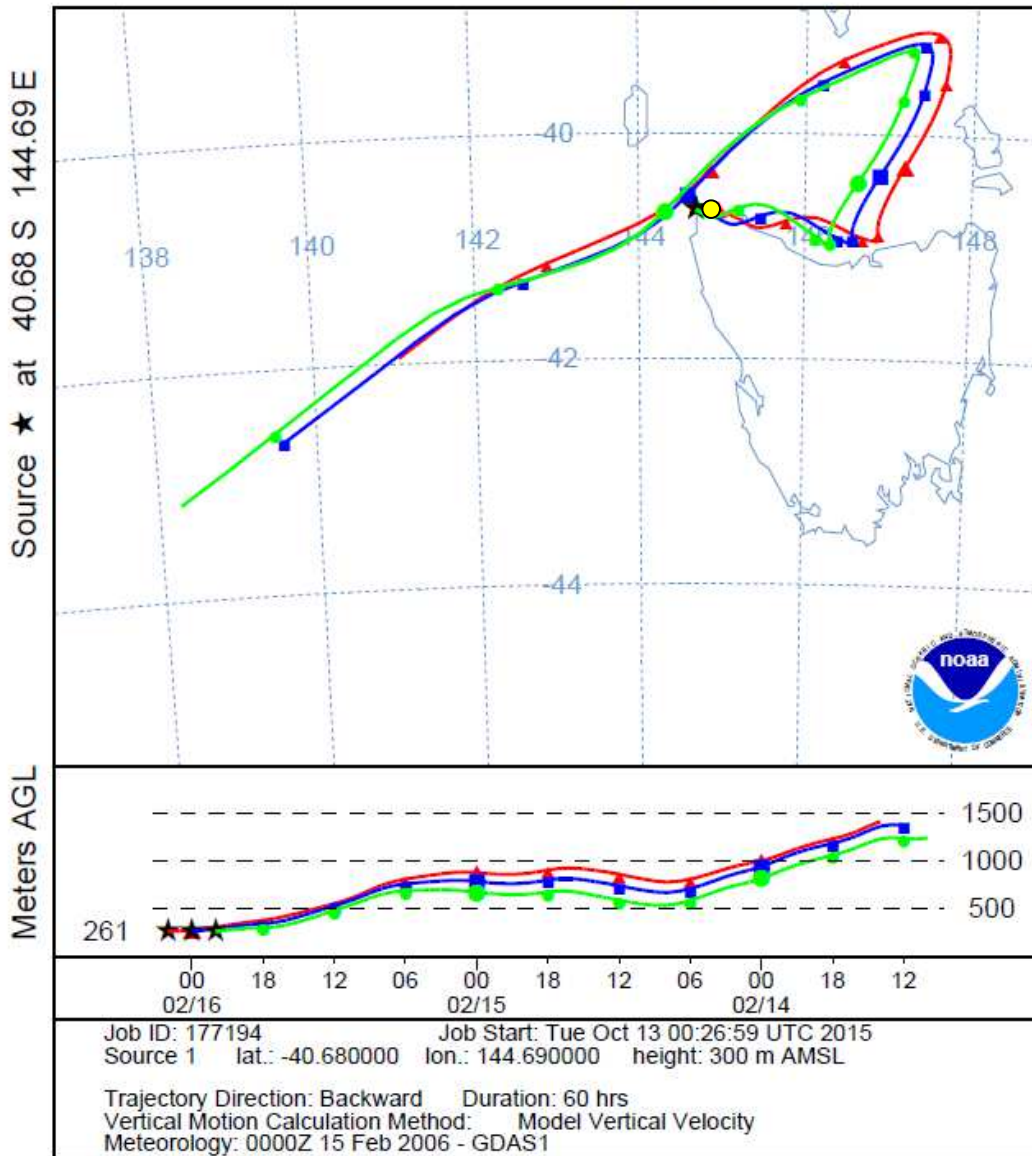

1

2 Fig 1b. Air mass back trajectory corresponding to BB1 Period B, particle growth event. Three back  
 3 trajectories have been run and finish at 8:00, 10:00 and 12:00 on 16<sup>th</sup> February 2006 Australian  
 4 Eastern Standard Time (AEST). Yellow circle indicates approximate fire location.

5

6

NOAA HYSPLIT MODEL  
 Backward trajectories ending at 2000 UTC 16 Feb 06  
 GDAS Meteorological Data

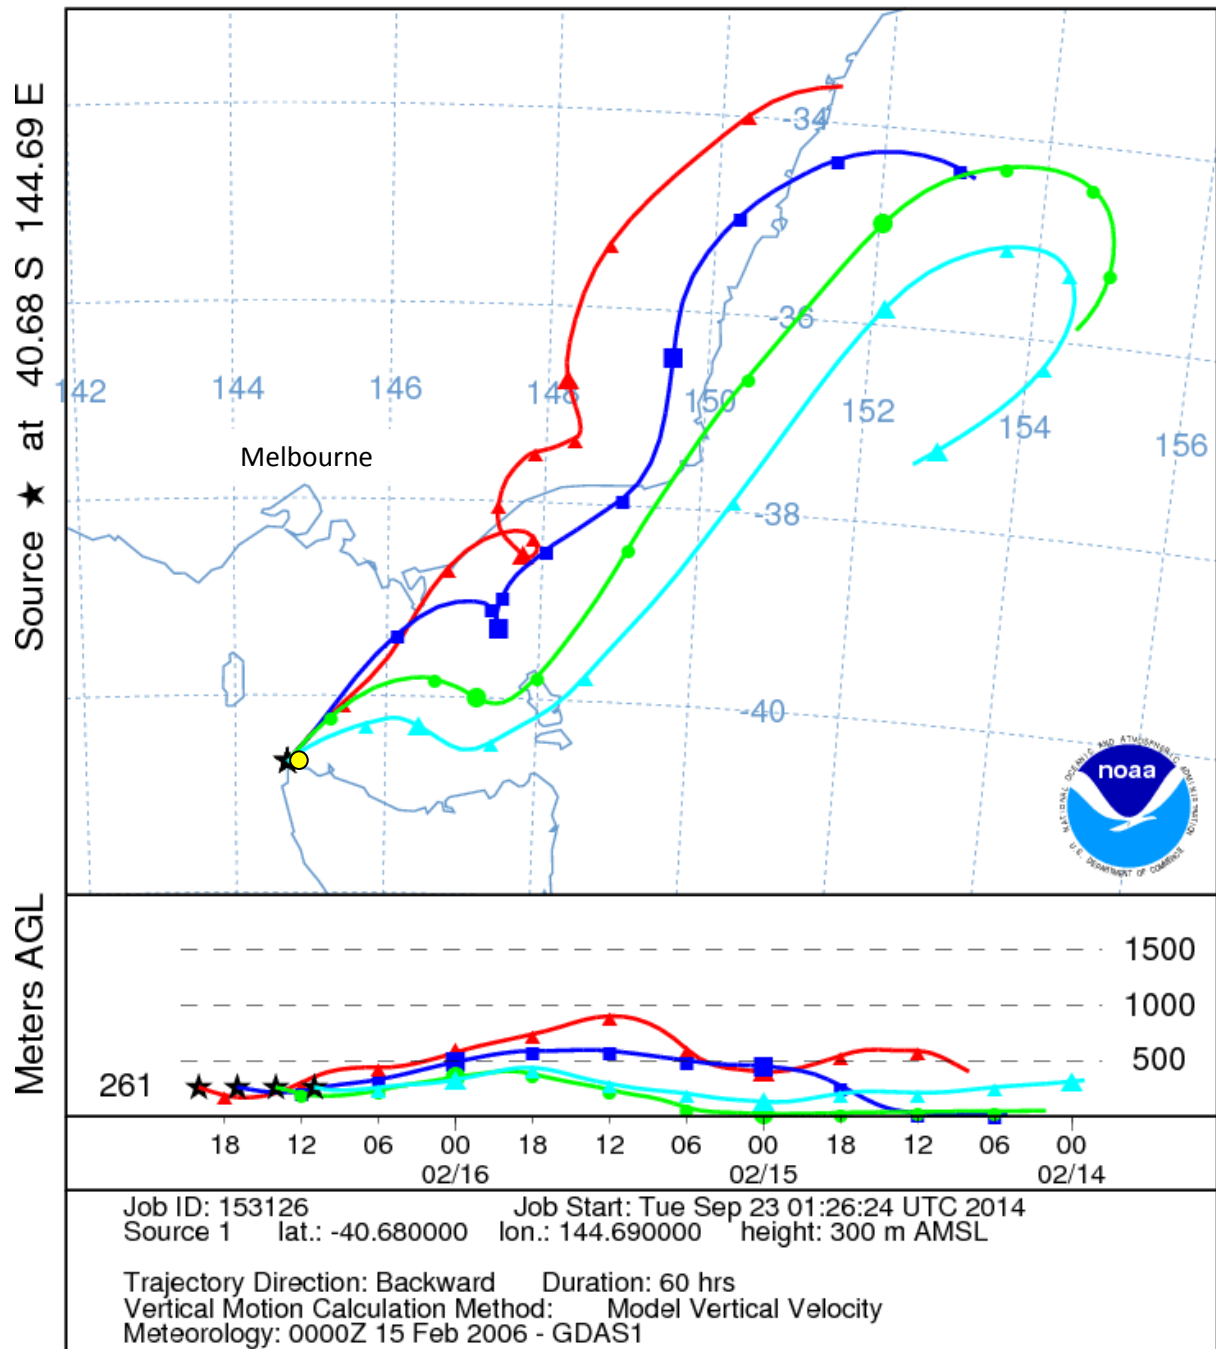

1

2 Fig 1c. Air mass back trajectory corresponding to BB1 Period C, mainland influence (background).  
 3 Four back trajectories have been run and finish at 21:00 on the 16 February, 0:00, 3:00 and 6:00 on  
 4 17<sup>th</sup> February 2006 Australian Eastern Standard Time (AEST). Yellow circle indicates approximate fire  
 5 location.

6

7

NOAA HYSPLIT MODEL  
 Backward trajectories ending at 0200 UTC 17 Feb 06  
 GDAS Meteorological Data

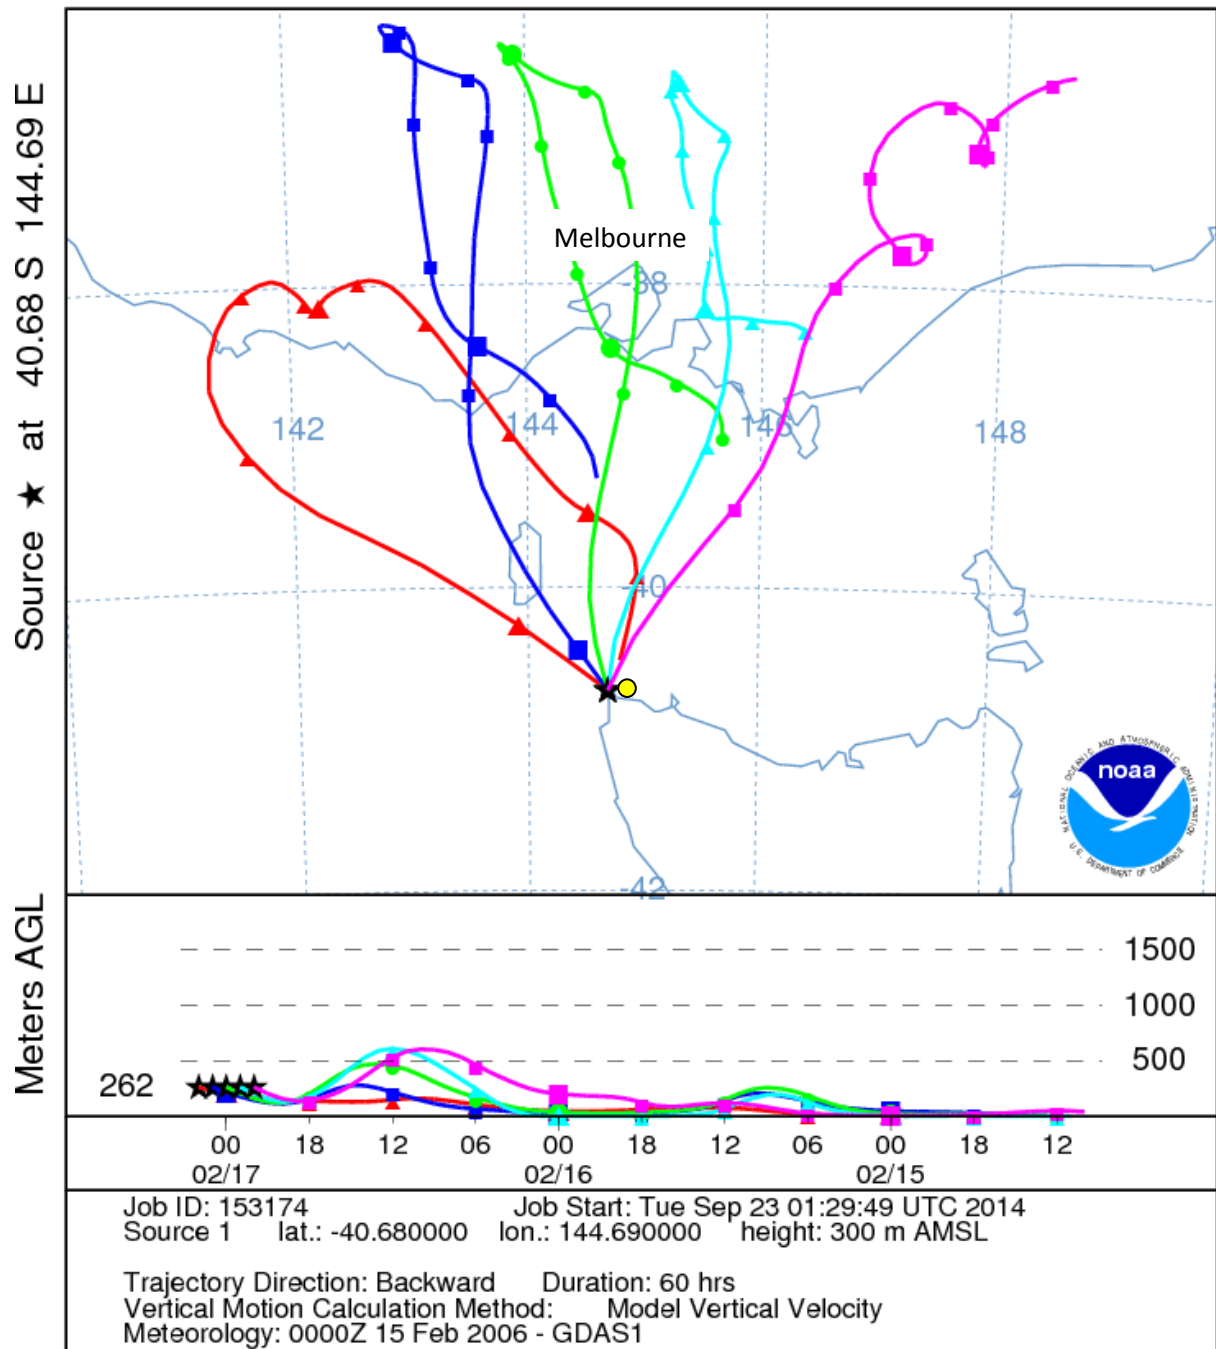

1

2 Fig 1d. Air mass back trajectory corresponding to BB1 Period D, mainland influence (urban). Five  
 3 back trajectories have been run and finish at 8:00, 9:00, 10:00, 11:00 and 12:00 on 17<sup>th</sup> February  
 4 2006 Australian Eastern Standard Time (AEST). Yellow circle indicates approximate fire location.

5

6

NOAA HYSPLIT MODEL  
 Backward trajectories ending at 0800 UTC 17 Feb 06  
 GDAS Meteorological Data

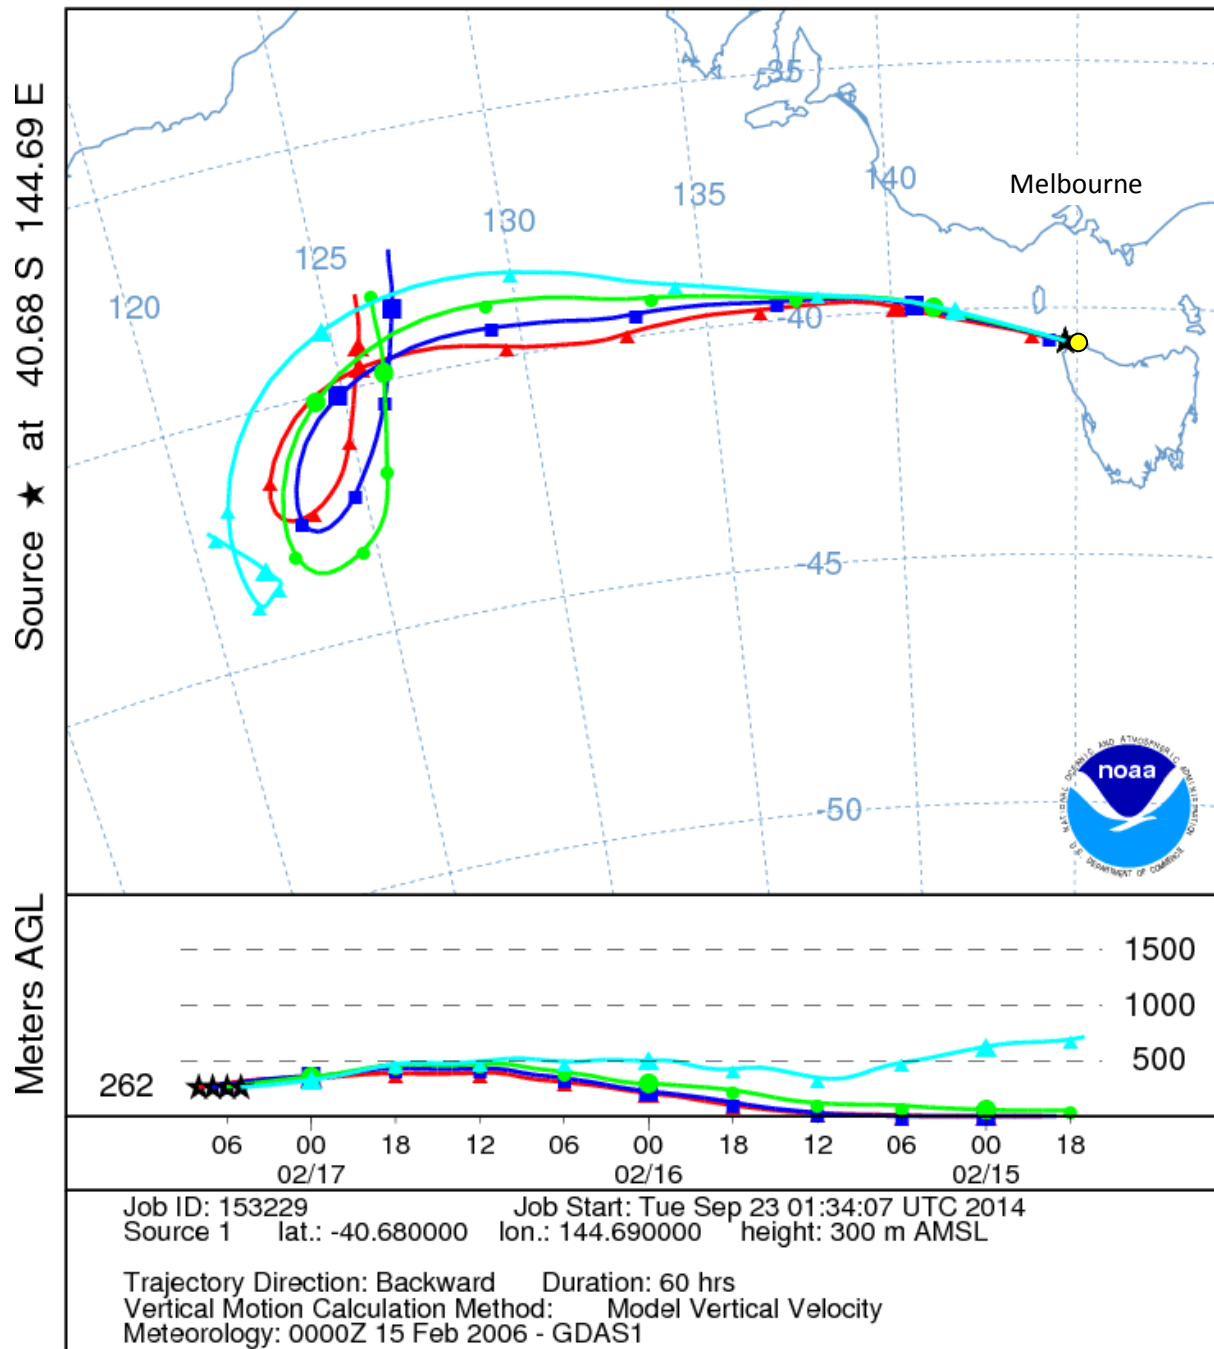

1

2 Fig 1e. Air mass back trajectory corresponding to BB1 Period E, clean marine air. Four back  
 3 trajectories have been run and finish at 15:00, 16:00, 17:00 and 18:00 on 17<sup>th</sup> February 2006  
 4 Australian Eastern Standard Time (AEST). Yellow circle indicates approximate fire location.

5

6

NOAA HYSPLIT MODEL  
 Backward trajectories ending at 1100 UTC 18 Feb 06  
 GDAS Meteorological Data

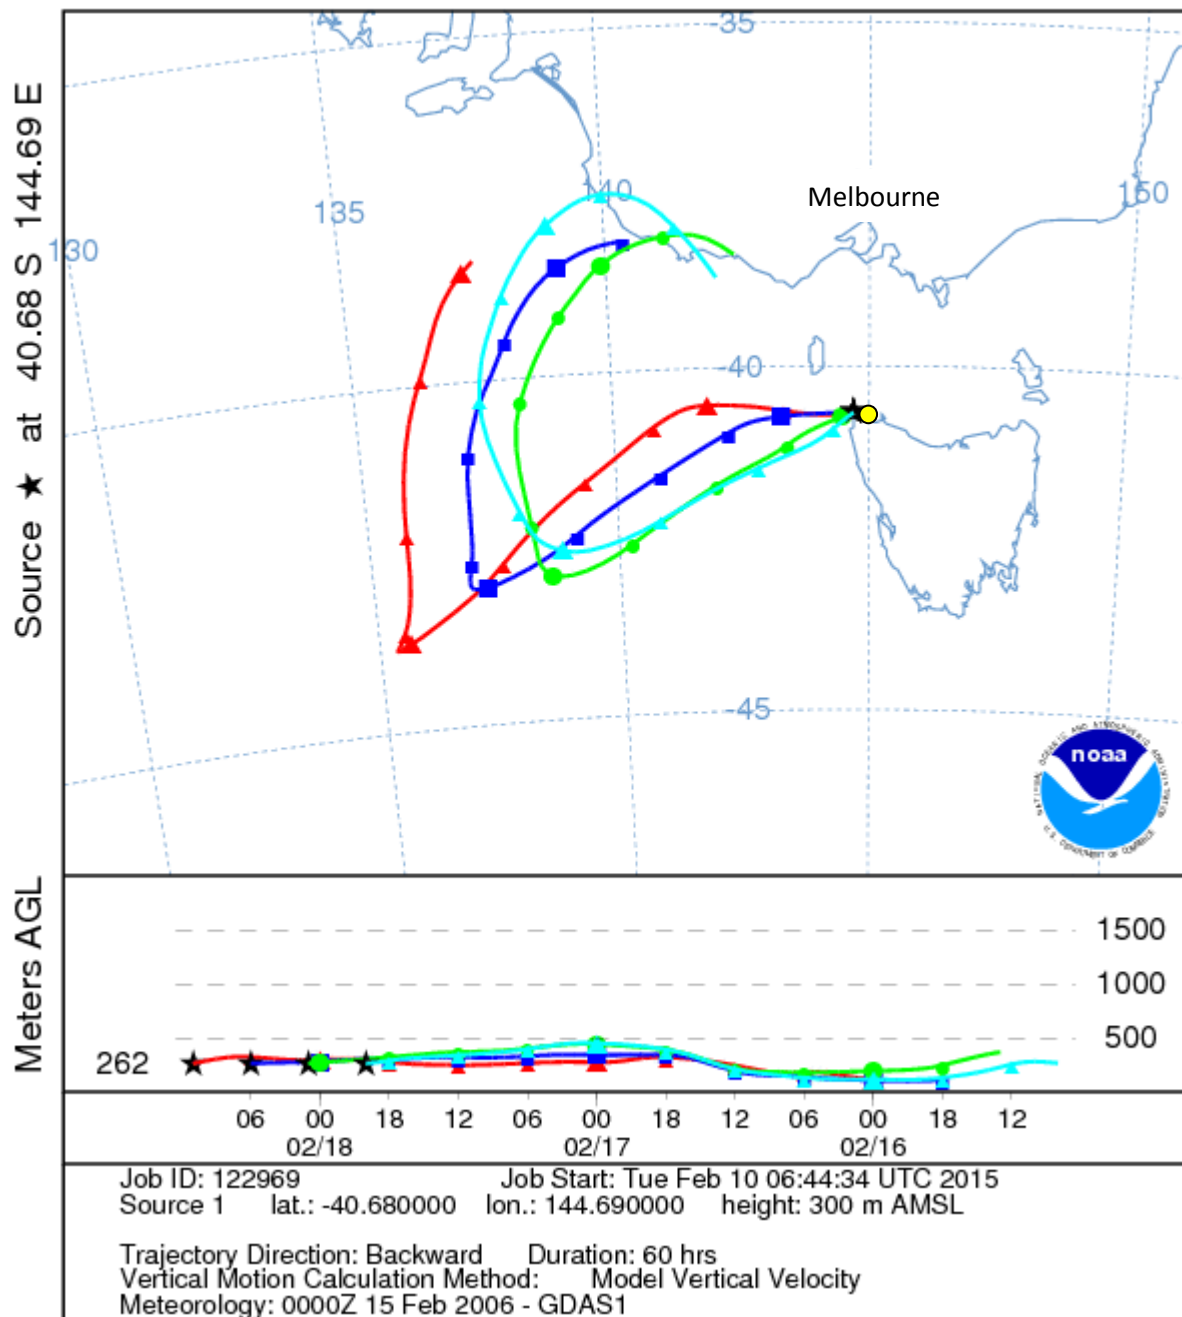

1

2 Fig 1 f. Air mass back trajectory corresponding to BB1 Period F, marine air with minor terrestrial  
 3 influence. Four back trajectories have been run and finish at 6:00, 11:00, 16:00 and 21:00 on 18<sup>th</sup>  
 4 February 2006 Australian Eastern Standard Time (AEST). Yellow circle indicates approximate fire  
 5 location.

6

NOAA HYSPLIT MODEL  
 Backward trajectories ending at 0000 UTC 24 Feb 06  
 GDAS Meteorological Data

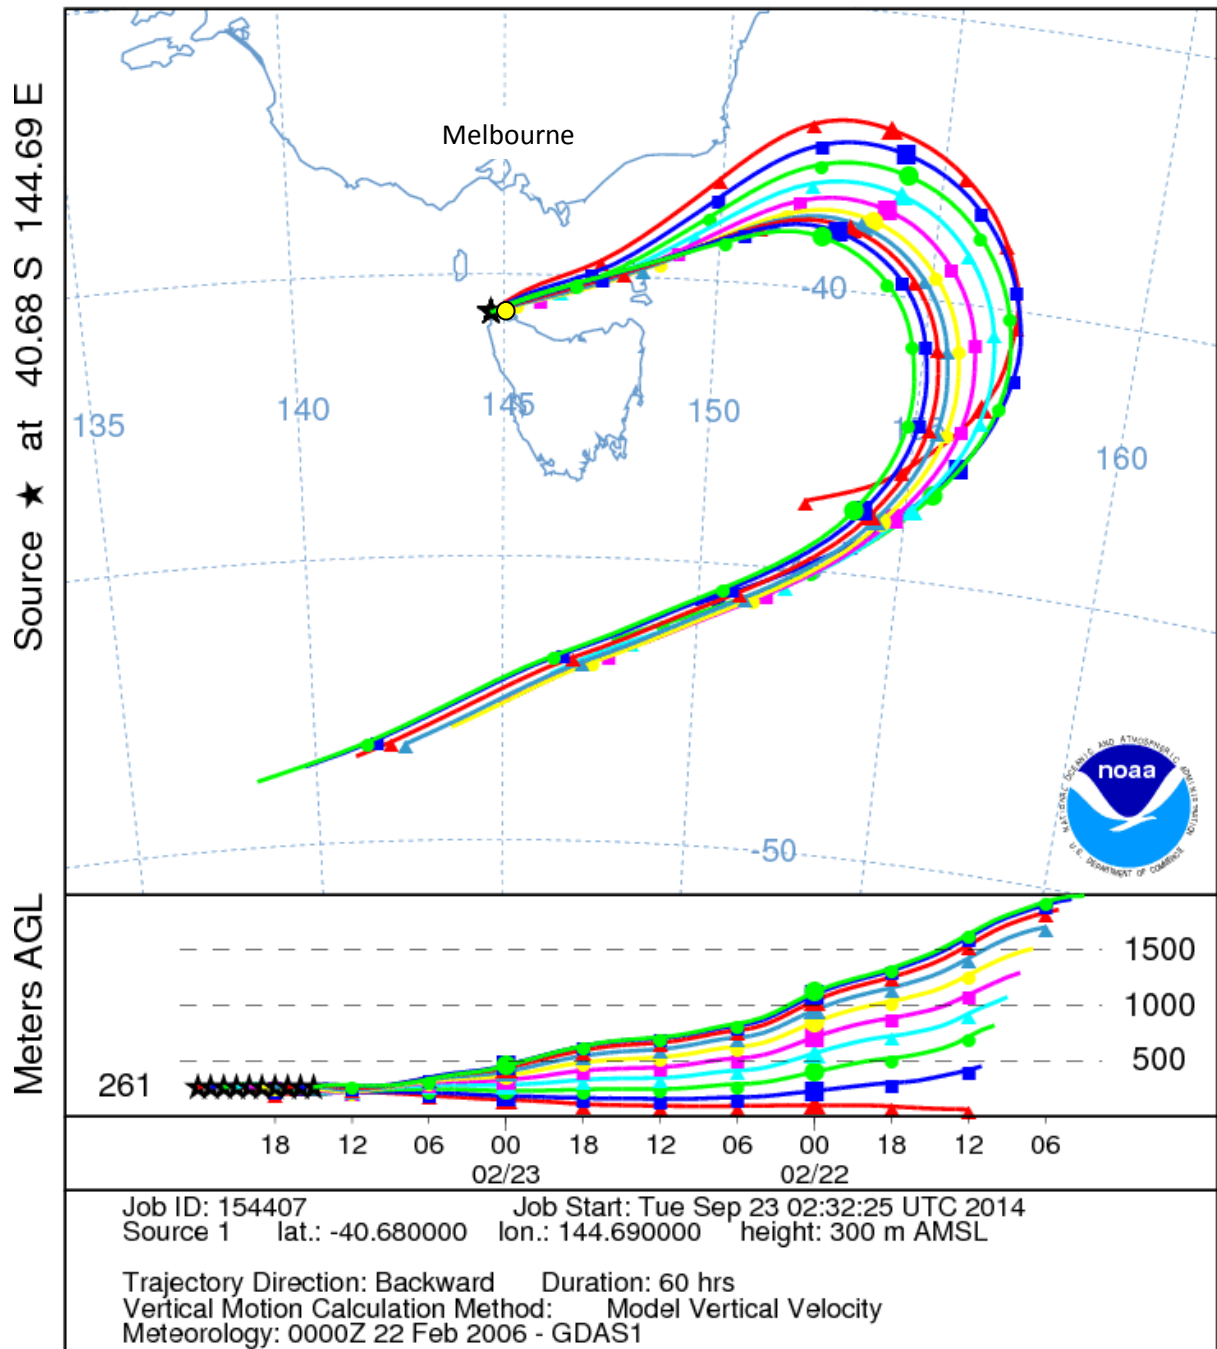

1

2 Fig 2a. Air mass back trajectory corresponding to BB2 Period A, fresh BB plume. Ten back trajectories  
 3 have been run and finish at 1:00, 2:00, 3:00, 4:00, 5:00, 6:00, 7:00, 8:00, 9:00 and 10:00 on 24<sup>th</sup>  
 4 February 2006 Australian Eastern Standard Time (AEST). Yellow circle indicates approximate fire  
 5 location.

6

7



NOAA HYSPLIT MODEL  
 Backward trajectories ending at 1800 UTC 24 Feb 06  
 GDAS Meteorological Data

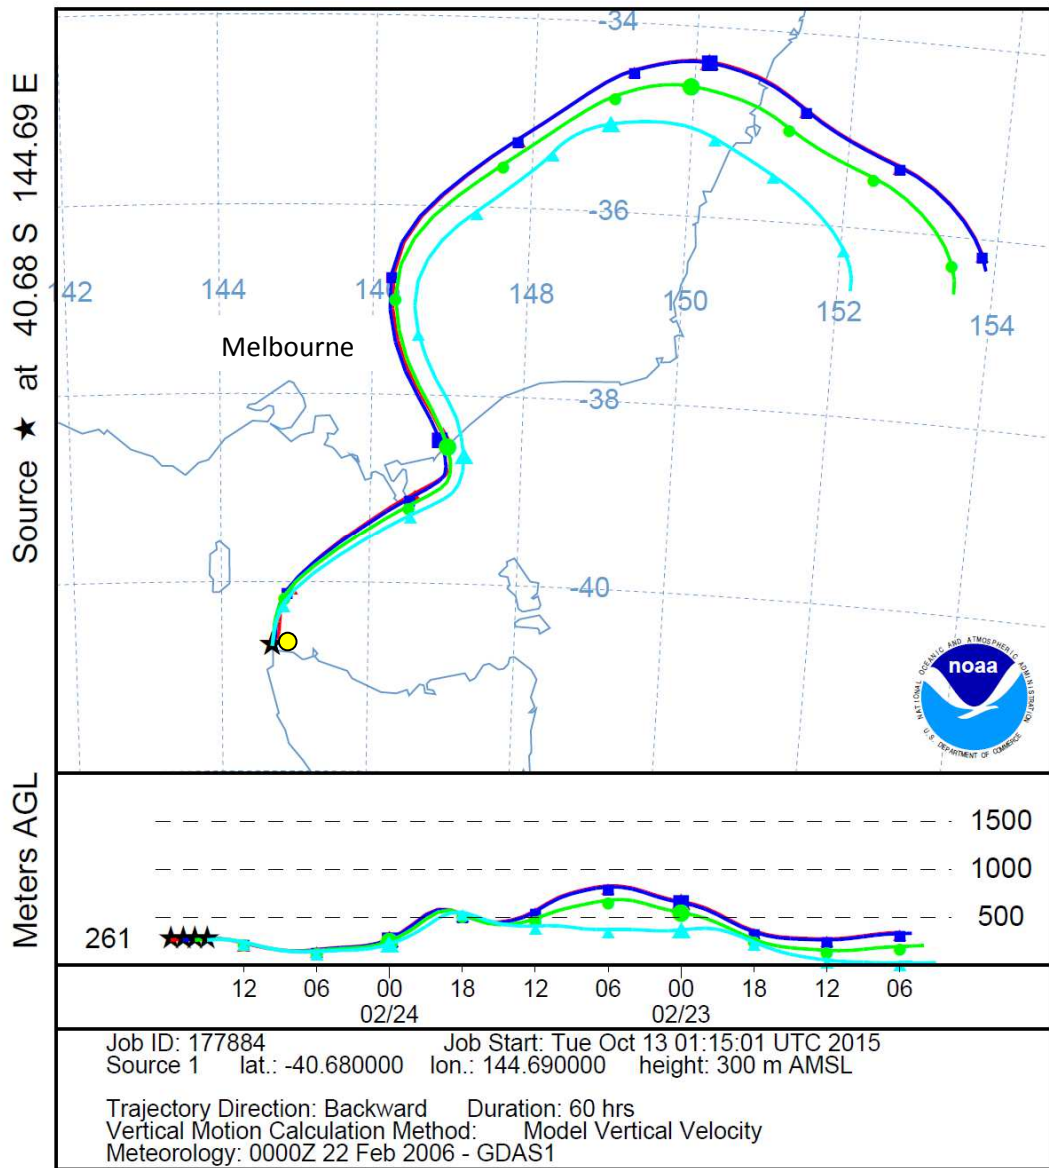

1  
 2  
 3  
 4  
 5  
 6  
 7

Fig 2b. Air mass back trajectory corresponding to BB2 Period B, mainland influence (background). .  
 Four back trajectories have been run and finish at 1:00, 2:00, 3:00, 4:00 on 25<sup>th</sup> February 2006  
 Australian Eastern Standard Time (AEST). Yellow circle indicates approximate fire location.

NOAA HYSPLIT MODEL  
 Backward trajectories ending at 0500 UTC 25 Feb 06  
 GDAS Meteorological Data

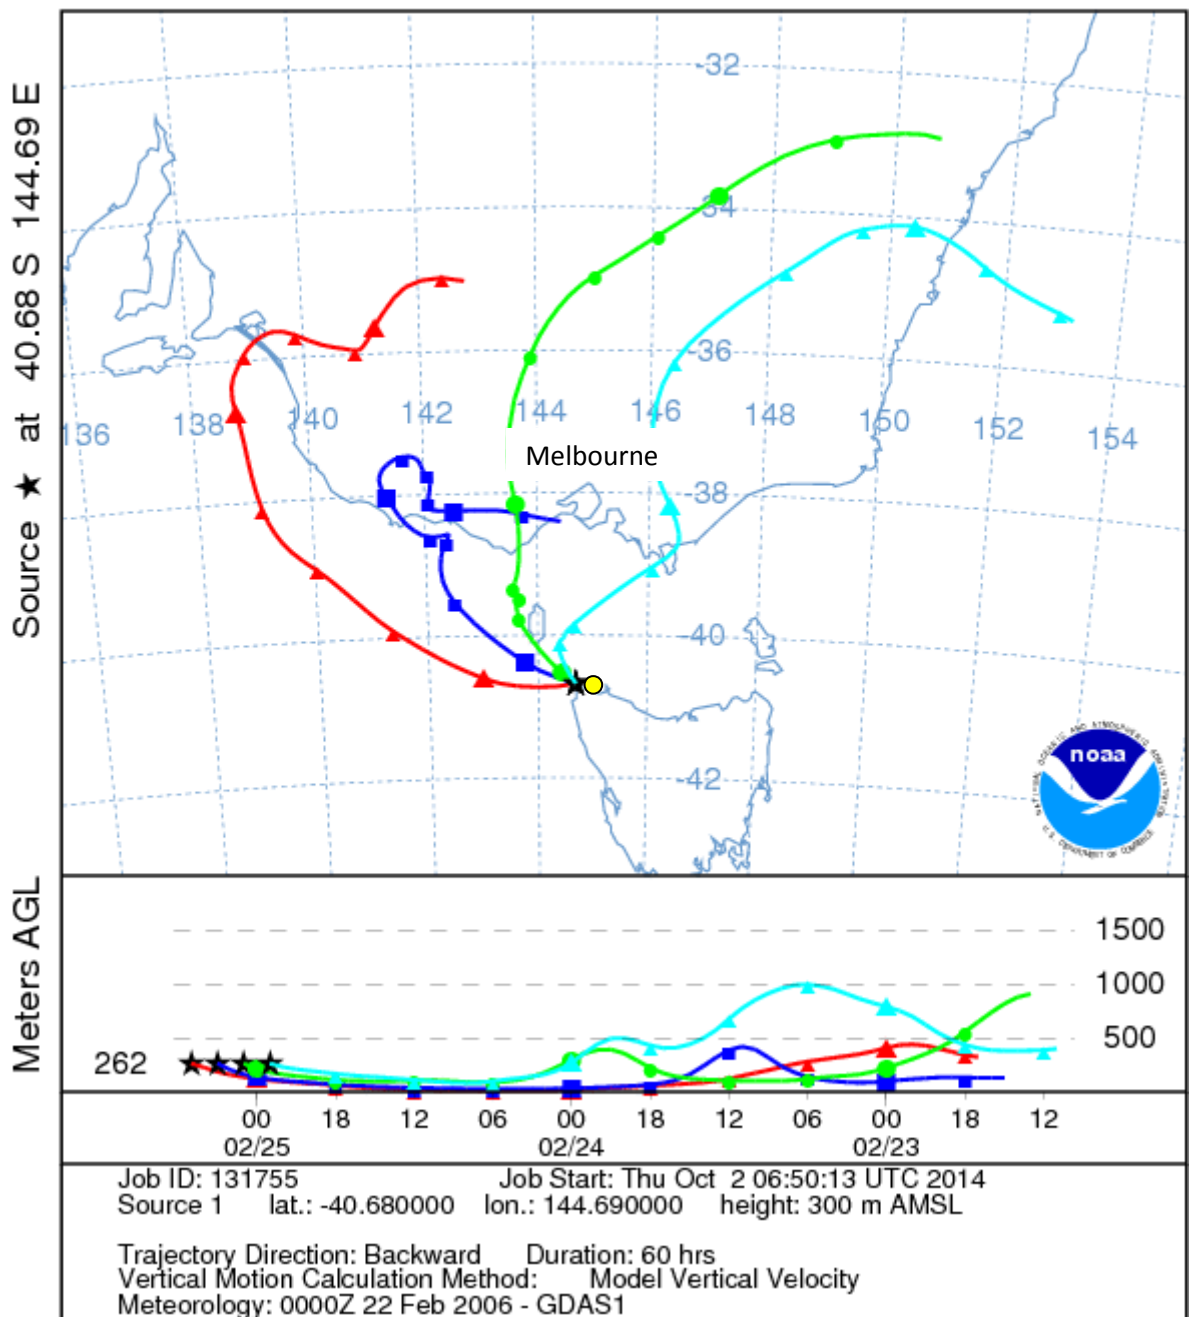

1  
2

3 Fig 2c. Air mass back trajectory corresponding to BB2 Period C, mainland influence (urban). Four  
 4 back trajectories have been run and finish at 9:00, 11:00, 13:00 and 15:00 on 25<sup>th</sup> February 2006  
 5 Australian Eastern Standard Time (AEST). Yellow circle indicates approximate fire location.

6  
7

NOAA HYSPLIT MODEL  
 Backward trajectory ending at 1300 UTC 25 Feb 06  
 GDAS Meteorological Data

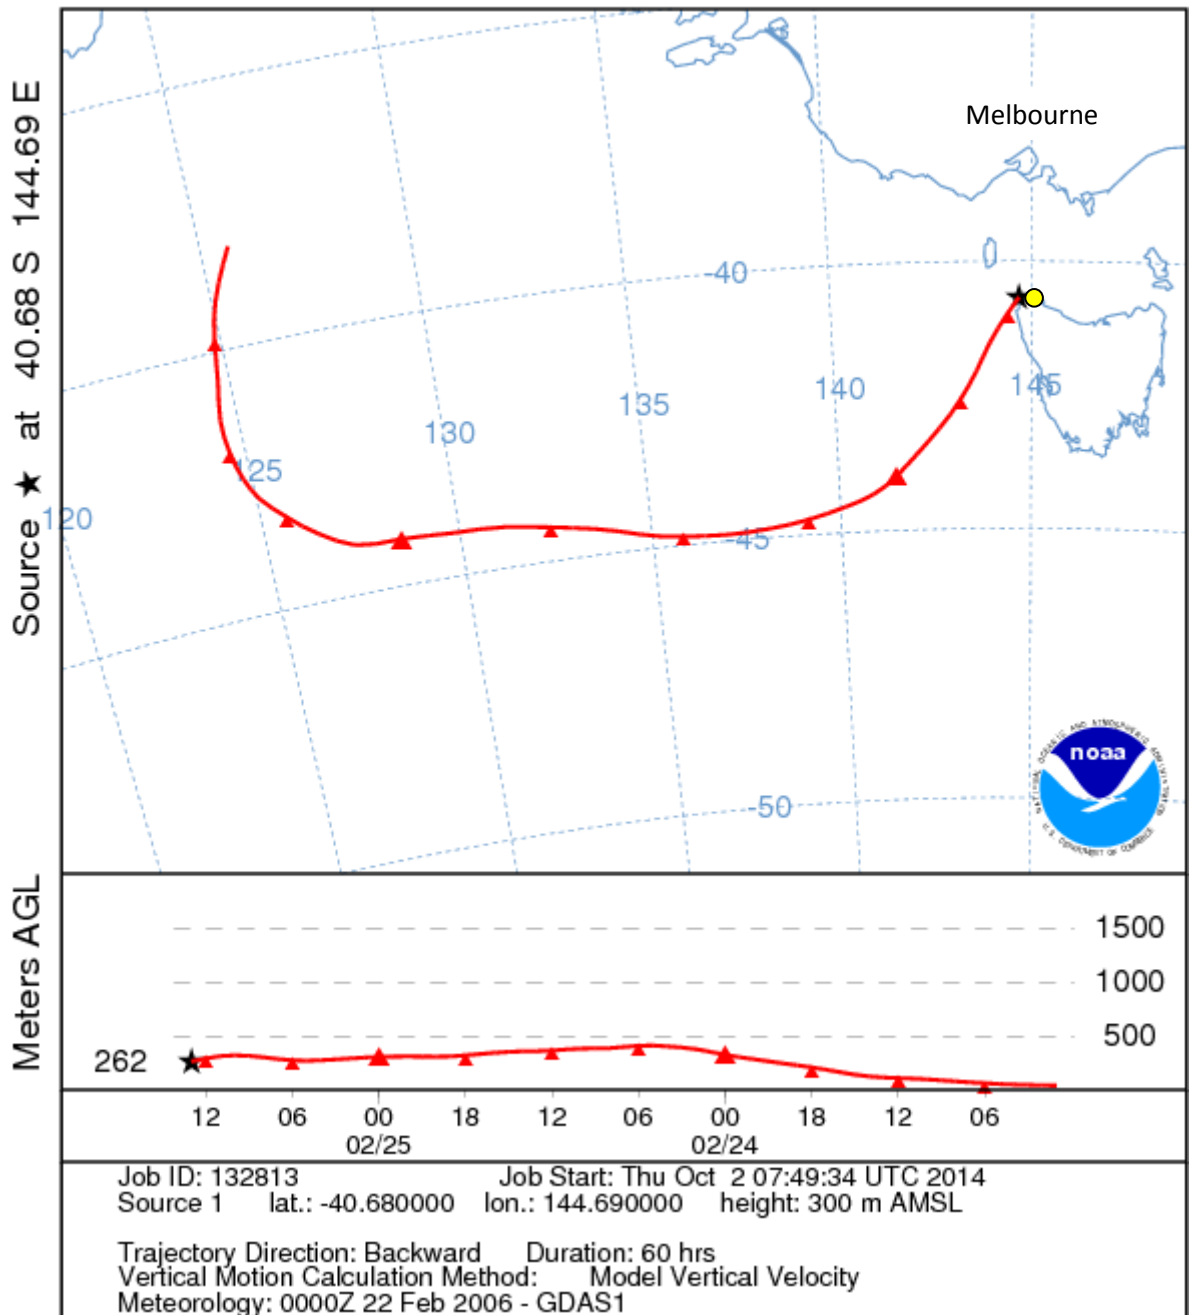

1  
 2  
 3  
 4  
 5  
 6  
 7

Fig 2d. Air mass back trajectory corresponding to BB2 Period D, clean marine air. Back trajectory ends at 23:00 on the 25<sup>th</sup> February 2006 Australian Eastern Standard Time (AEST). Yellow circle indicates approximate fire location.

| Compound                                   | formula                                      | EF (g kg <sup>-1</sup> ) <sup>a</sup> | EF (g kg <sup>-1</sup> ) <sup>b</sup> |
|--------------------------------------------|----------------------------------------------|---------------------------------------|---------------------------------------|
| methane                                    | CH <sub>4</sub>                              | 3.8                                   | 2.5                                   |
| hydrogen                                   | H <sub>2</sub>                               | 0.93                                  | 0.64                                  |
| ethane                                     | C <sub>2</sub> H <sub>6</sub>                | 0.41                                  | 0.30                                  |
| hydrogen cyanide (m/z 28)                  | HCN                                          | 0.73                                  | 0.49                                  |
| methanol (m/z 33)                          | CH <sub>3</sub> OH                           | 2.07                                  | 1.4                                   |
| acetonitrile (m/z 42)                      | C <sub>2</sub> H <sub>3</sub> N              | 0.25                                  | 0.17                                  |
| acetaldehyde (m/z 45)                      | CH <sub>3</sub> CHO                          | 0.92                                  | 0.62                                  |
| acetone/propanal (m/z 59)                  | C <sub>3</sub> H <sub>6</sub> O              | 0.54                                  | 0.36                                  |
| acetic acid (m/z 61)                       | CH <sub>3</sub> COOH                         | 0.75                                  | 0.52                                  |
| furan/isoprene (m/z 69)                    | C <sub>4</sub> H <sub>4</sub> O              | 1.69                                  | 1.15                                  |
| MVK/MAK (m/z 71)                           | C <sub>4</sub> H <sub>6</sub> O              | 0.38                                  | 0.26                                  |
| methylglyoxal/methyl ethyl ketone (m/z 73) | C <sub>4</sub> H <sub>8</sub> O              | 0.35                                  | 0.24                                  |
| benzene (m/z 79)                           | C <sub>6</sub> H <sub>6</sub>                | 0.69                                  | 0.47                                  |
| unknown (m/z 85)                           | unknown                                      | 0.57                                  | 0.39                                  |
| unknown (m/z 87)                           | C <sub>4</sub> H <sub>6</sub> O <sub>2</sub> | 0.39                                  | 0.27                                  |
| toluene (m/z 93)                           | C <sub>7</sub> H <sub>8</sub>                | 0.30                                  | 0.20                                  |
| phenol (m/z 95)                            | C <sub>6</sub> H <sub>5</sub> OH             | 0.35                                  | 0.24                                  |
| xylenes (m/z 107)                          | C <sub>8</sub> H <sub>10</sub>               | 0.26                                  | 0.18                                  |
| unknown (m/z 113)                          | unknown                                      | 0.25                                  | 0.17                                  |
| C <sub>3</sub> -benzenes (m/z 121)         | C <sub>9</sub> H <sub>12</sub>               | 0.27                                  | 0.18                                  |
| monoterpenes (m/z 137)                     | C <sub>10</sub> H <sub>16</sub>              | 0.11                                  | 0.08                                  |
| methyl chloride                            | CH <sub>3</sub> Cl                           | 0.28                                  | 0.21                                  |
| methyl bromide                             | CH <sub>3</sub> Br                           | 0.019                                 | 0.015                                 |
| methyl iodide                              | CH <sub>3</sub> I                            | 0.0025                                | 0.0019                                |
| black carbon                               | n/a                                          | 0.16                                  | 0.22                                  |

1 emission factors for selected species calculated using <sup>a</sup>carbon mass balance method and  
2 <sup>b</sup> ER to CO method. EF for CO taken from temperate forest (Akagi et al 2011)

3

4 EFs (g/kg fuel) were calculated using the equation detailed in Andreae et al., (2001), using CO as the  
5 reference gas:

$$6 \quad EF(X) = ER(X / CO) \times \frac{MW(X)}{MW(CO)} \times EF(CO) \quad (1)$$

7 Where EF (X) is the calculated emission factor in g/kg fuel, ER (X/CO) is the molar emission ratio with  
8 respect to CO, MW(X) is the molecular weight of the trace species, MW (CO) is the molecular weight  
9 of CO, and EF(CO) is the emission factor of CO. The EF (CO) used was the temperate average EF from  
10 Akagi et al., (2011) (original publication) of 89 ±32 g CO kg<sup>-1</sup> fuel, which corresponds to MCE of 0.92.

11
